# Supplementary material for: UIO-66-NH2-derived mesoporous carbon used as a high-performance anode for the potassium-ion battery
Source: Royal Society of Chemistry journal article supplement (doi:10.1039/d0ra08808k), 2021-01-01
Supplement: d0ra08808k1.pdf [file d0ra08808k1.pdf]

## Supporting Information

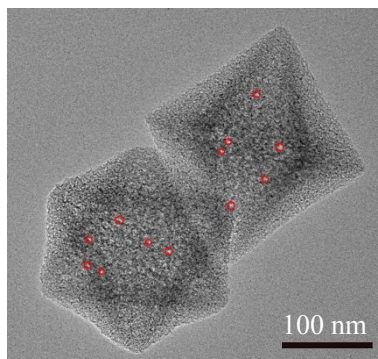

**Fig.S1** HAAD-STEM image of the N-PC sample.

**Table S1.** The atomic fractions of N-PC and PC, obtained by XPS.

| Sample | C     | N     | O     |
|--------|-------|-------|-------|
|        | [at%] | [at%] | [at%] |
| N-PC   | 84.94 | 10.90 | 4.16  |
| PC     | 87.37 | 6.69  | 5.94  |

**Table S2.** Fractions of the different N species present in PC and N-PC.

| Sample | Oxidized-N | Graphitic-N | Pyrrolic-N | Pyridinic-N |
|--------|------------|-------------|------------|-------------|
|        | [%]        | [%]         | [%]        | [%]         |
| N-PC   | 10.32      | 17.44       | 51.72      | 20.52       |
| PC     | 21.37      | 12.41       | 50.07      | 16.15       |

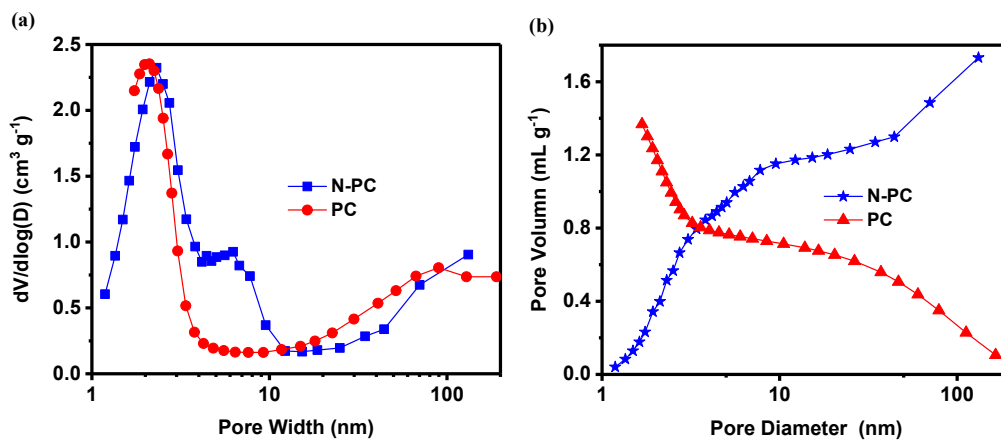

**Fig.S2** (a) Pore-size distributions of PC and N-PC; (b) pore volumes of PC and N-PC.

**Table S3.** Surface areas of UIO-66-NH<sub>2</sub> and N@UIO-66-NH<sub>2</sub>.

| Sample                    | $S_{\text{BET}}/\text{m}^2 \text{g}^{-1}$ |
|---------------------------|-------------------------------------------|
| UIO-66-NH <sub>2</sub>    | 1109                                      |
| N@ UIO-66-NH <sub>2</sub> | 627                                       |

**Table S4.** Surface areas, mesopore volumes, and meso-porosity of prepared samples.

| Sample | $S_{\text{BET}}/\text{m}^2 \text{g}^{-1}$ | $V_{\text{mes}}/\text{cm}^3 \text{g}^{-1}$ | Mesoporosity/% |
|--------|-------------------------------------------|--------------------------------------------|----------------|
| PC     | 1804                                      | 0.799                                      | 58             |
| N-PC   | 1697                                      | 1.143                                      | 66             |

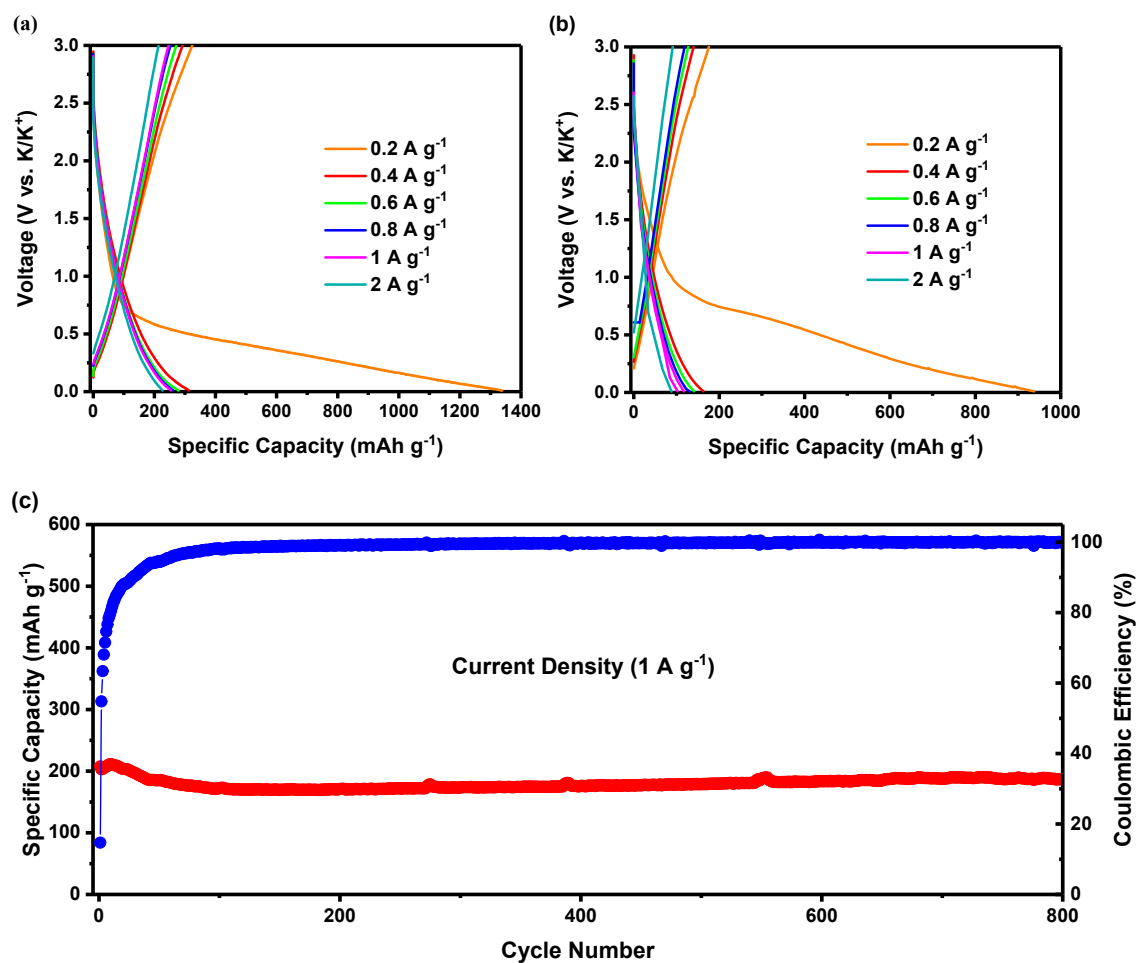

**Fig.S3** The galvanostatic charge/discharge profiles of (a) N-PC and (b) PC at different rates; (c) cycling performance of N-PC at a current density of 1 A g<sup>-1</sup>.

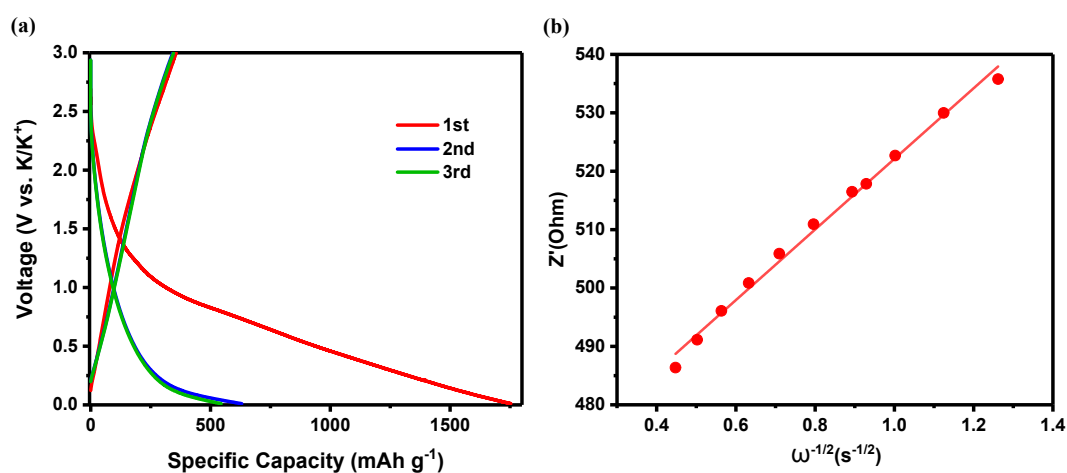

**Fig.S4** (a) The first three charge-discharge profiles of N-PC at 0.1 A g<sup>-1</sup>; (b) the linear relation

between  $\omega^{-1/2}$  and  $Z'$  at low frequencies.

**Table S5** The simulated results from EIS data of PC and N-PC.

| Sample | $R_s(\Omega)$ | $R_{ct}(\Omega)$ | $D_{K^+}$ (cm <sup>2</sup> s <sup>-1</sup> ) |
|--------|---------------|------------------|----------------------------------------------|
| N-PC   | 4.19          | 232.19           | $3.47 \times 10^{-11}$                       |
| PC     | 4.21          | 500.85           | $2.48 \times 10^{-11}$                       |
